# Supplementary figures and images for: Epigenetic control of ataxin‐1 in multiple sclerosis
Source: PubMed Central journal article supplement — Ann Clin Transl Neurol. 2022 Jul 28;9(8):1186–94. doi: 10.1002/acn3.51618 (PMC9380165; doi:10.1002/acn3.51618), 2022-07-28

gencodeV29

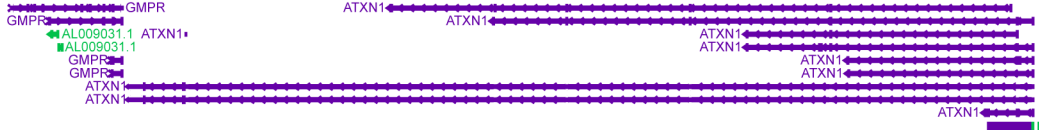

Ruler  
chr6

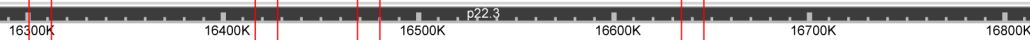

metilene

defiant

SMART

DMR4

DMR3

DMR2

DMR1

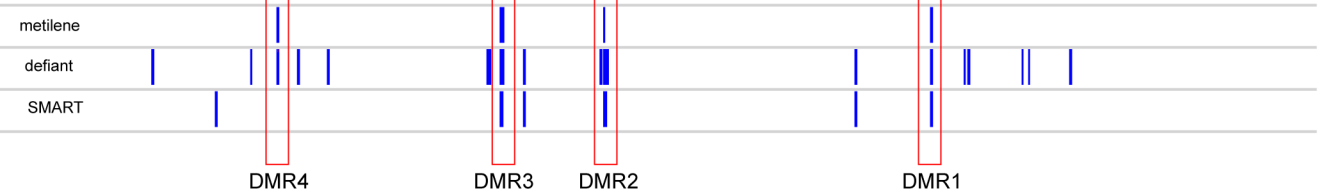

Supplement: ACN3-9-1186-s002.pdf [file ACN3-9-1186-s002.pdf]
